# Supplementary material for: New nonlinear optical oxyfluoride K2NbO2F3 with strong pseudo-centrosymmetry, obtained by mild hydrothermal synthesis
Source: Royal Society of Chemistry journal article supplement (doi:10.1039/d3nj04922a), 2024-01-01
Supplement: d3nj04922a1.pdf [file d3nj04922a1.pdf]

**Table S1.** Crystal data and structure refinement for  $K_2NbO_2F_3$

|                                                                 |                           |
|-----------------------------------------------------------------|---------------------------|
| Formula                                                         | $K_2NbO_2F_3$             |
| Formula weight                                                  | 260.11                    |
| Crystal system                                                  | orthorhombic              |
| Space group, $Z$                                                | $Pna2_1$ , 4              |
| $a$ , Å                                                         | 7.6269(2)                 |
| $b$ , Å,                                                        | 11.8526(4)                |
| $c$ , Å                                                         | 5.70105(16)               |
| $V$ , Å <sup>3</sup>                                            | 515.37(3)                 |
| $D_x$ , g/cm <sup>3</sup>                                       | 3.352                     |
| Wavelength, Å                                                   | Mo- $K_\alpha$ ; 0.71073  |
| $\mu$ , mm <sup>-1</sup>                                        | 3.919                     |
| $\theta_{max}$ , range/degree                                   | 3.18-30.67                |
| Refl. collected/unique/ $R_{int}$                               | 7876 / 1508 / 1366 / 4.66 |
| Completeness to $\Theta$ , %                                    | 0.974                     |
| Parameters                                                      | 73                        |
| GOF (S)                                                         | 1.110                     |
| $R_{all}$ , $R_{gb}$ , $R_{wgt}$ <sup>1</sup>                   | 0.0592, 0.0545, 0.1308    |
| $\Delta\rho_{min}/\Delta\rho_{max}$ , $\varrho$ /Å <sup>3</sup> | -4.756 / 0.879            |

$$^1 R_{gt} = \Sigma //F_o // - /F_c // / = \Sigma /F_o / \text{ and } R_{wgt} = [\Sigma w (F_o^2 - F_c^2)^2 / \Sigma w (F_o^2)]^{1/2} \text{ for } F_o^2 > 2\sigma(F_o^2).$$

**Table S2.** Atomic coordinates and equivalent displacement parameters for  $K_2NbO_2F_3$

| Atom | $x/a$      | $y/b$      | $z/c$     | $U_{eqv}$ Å <sup>2</sup> |
|------|------------|------------|-----------|--------------------------|
| Nb   | 0.13928(5) | 0.06229(3) | 0.4861(7) | 0.0098(2)                |
| K1   | -0.0124(2) | 0.2401(1)  | 0.985(1)  | 0.0192(3)                |
| K2   | 0.1434(1)  | 0.4175(1)  | 0.486(2)  | 0.0220(3)                |
| O1   | -0.001(3)  | -0.005(2)  | 0.736(3)  | 0.0199(10)               |
| O2   | 0.0432(6)  | 0.1991(3)  | 0.494(3)  | 0.0260(11)               |
| F1   | 0.2809(4)  | -0.0921(3) | 0.491(3)  | 0.0240(8)                |
| F2   | 0.3250(15) | 0.1038(10) | 0.7209(9) | 0.021(2)                 |
| F3   | 0.3211(16) | 0.1060(12) | 0.2495(9) | 0.029(3)                 |

**Table S3.** Interatomic distances for  $K_2NbO_2F_3$ .

| Bond           | Distance, Å | Bond              | Distance, Å |
|----------------|-------------|-------------------|-------------|
| Nb – O2        | 1.780(4)    | Nb- F2            | 2.010(8)    |
| Nb – O1        | 1.900(17)   | Nb- F1            | 2.125(3)    |
| Nb – O1'       | 1.951(17)   | <b>av.Nb-F</b>    | 2.045       |
| Nb – F3        | 2.003(9)    | <b>av. Nb – O</b> | 1.879       |
| <b>K1</b> – F1 | 2.660(3)    | <b>K2</b> – F2    | 2.686(11)   |
| K1 – F3        | 2.686(10)   | K2 – O2           | 2.700(5)    |

|                   |           |                   |           |
|-------------------|-----------|-------------------|-----------|
| K1 – F2           | 2.688(10) | K2 – F3           | 2.706(14) |
| K1 – F1`          | 2.697(4)  | K2 – F2`          | 2.785(13) |
| K1- O2            | 2.87(2)   | K2- F3`           | 2.817(14) |
| K1-O2`            | 2.98(2)   | K2-F1             | 2.881(17) |
| K1- O1            | 3.14(2)   | K2- F1`           | 2.940(17) |
| K1-O1`            | 3.23(2)   | K2-O1             | 3.21(2)   |
| <b>av. K1 – O</b> | 3.054     | K2-O1`            | 3.24(2)   |
| <b>av. K1- F</b>  | 2.683     | <b>Av. K2 – O</b> | 3.048     |
|                   |           | <b>Av.. K2- F</b> | 2.803     |
